# Supplementary material for: Evaluating the role of lactose anomeric composition in tablet disintegration and dissolution: a hidden variable in pharmaceutical formulation
Source: Royal Society of Chemistry journal article supplement (doi:10.1039/d4pm00256c), 2026-01-01
Supplement: d4pm00256c1.pdf [file d4pm00256c1.pdf]

## **Supplementary material**

### **Supplementary material S-1**

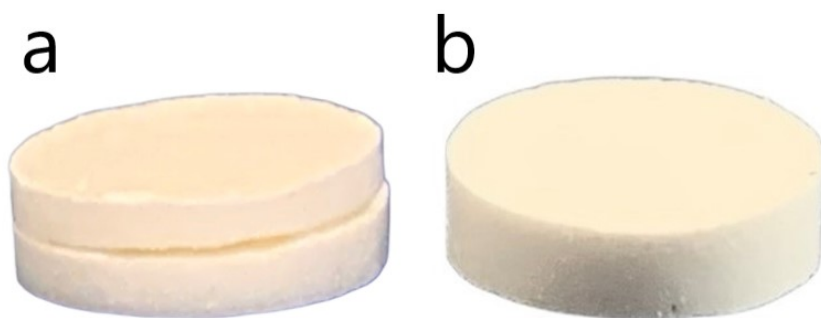

S-1: (a)  $\beta$  lactose (as received, 86.5%  $\beta$  anomer) tablets demonstrating ‘capping’ after compression and (b)  $\beta$  lactose as received + 4% MCC tablets, which remained intact after compression i.e. no ‘capping’.

## Supplementary material S-2

S-2: Characterisation of lactose tablets (plus 4% MCC) comprising lactose with different anomeric content. Data are presented as the mean  $\pm$ SD (n=10). \* Represents batches where some of the tablets initially included were rejected as having an unacceptable appearance and that were subsequently replaced (4 tablets in total).

| Tablet matrix                                                                                | Compaction Force (kN) | Weight (mg)      | Thickness (mm) | Diameter (mm)  | Visual appearance |
|----------------------------------------------------------------------------------------------|-----------------------|------------------|----------------|----------------|-------------------|
| <b><math>\beta</math> lactose anhydrous (as received) – 13.5% <math>\alpha</math> anomer</b> | 10                    | 300.2 $\pm$ 1.9  | 3.0 $\pm$ 0.2  | 10.0 $\pm$ 0.6 | Acceptable*       |
|                                                                                              | 20                    | 299.9 $\pm$ 2.7  | 3.1 $\pm$ 0.1  | 10.1 $\pm$ 0.3 |                   |
|                                                                                              | 40                    | 304.1 $\pm$ 4.9  | 2.9 $\pm$ 0.3  | 9.9 $\pm$ 0.2  |                   |
| <b>lactose 35 days storage (40°C/60%RH) - 50.2% <math>\alpha</math> anomer</b>               | 10                    | 305.5 $\pm$ 2.3  | 3.1 $\pm$ 0.2  | 10.1 $\pm$ 0.3 | Acceptable        |
|                                                                                              | 20                    | 300.5 $\pm$ 4.2  | 3.0 $\pm$ 0.1  | 10.1 $\pm$ 0.1 |                   |
|                                                                                              | 40                    | 304.1 $\pm$ 3.5  | 2.8 $\pm$ 0.4  | 9.8 $\pm$ 0.2  |                   |
| <b>lactose 60 days storage (40°C/60%RH) - 79.5% <math>\alpha</math> anomer</b>               | 10                    | 296.4 $\pm$ 5.7  | 3.0 $\pm$ 0.2  | 10.1 $\pm$ 0.6 | Acceptable        |
|                                                                                              | 20                    | 303.12 $\pm$ 3.4 | 3.1 $\pm$ 0.1  | 10.2 $\pm$ 0.3 |                   |
|                                                                                              | 40                    | 298.9 $\pm$ 1.7  | 2.9 $\pm$ 0.1  | 10.0 $\pm$ 0.8 |                   |
| <b><math>\alpha</math>-LMH (as received) – 96.6% <math>\alpha</math> anomer</b>              | 10                    | 298.2 $\pm$ 2.8  | 3.1 $\pm$ 0.1  | 10.2 $\pm$ 0.4 | Acceptable*       |
|                                                                                              | 20                    | 300.5 $\pm$ 4.4  | 3.1 $\pm$ 0.1  | 9.9 $\pm$ 0.4  |                   |
|                                                                                              | 40                    | 304 $\pm$ 4.1    | 2.9 $\pm$ 0.2  | 10.1 $\pm$ 0.3 |                   |

### Supplementary material S-3

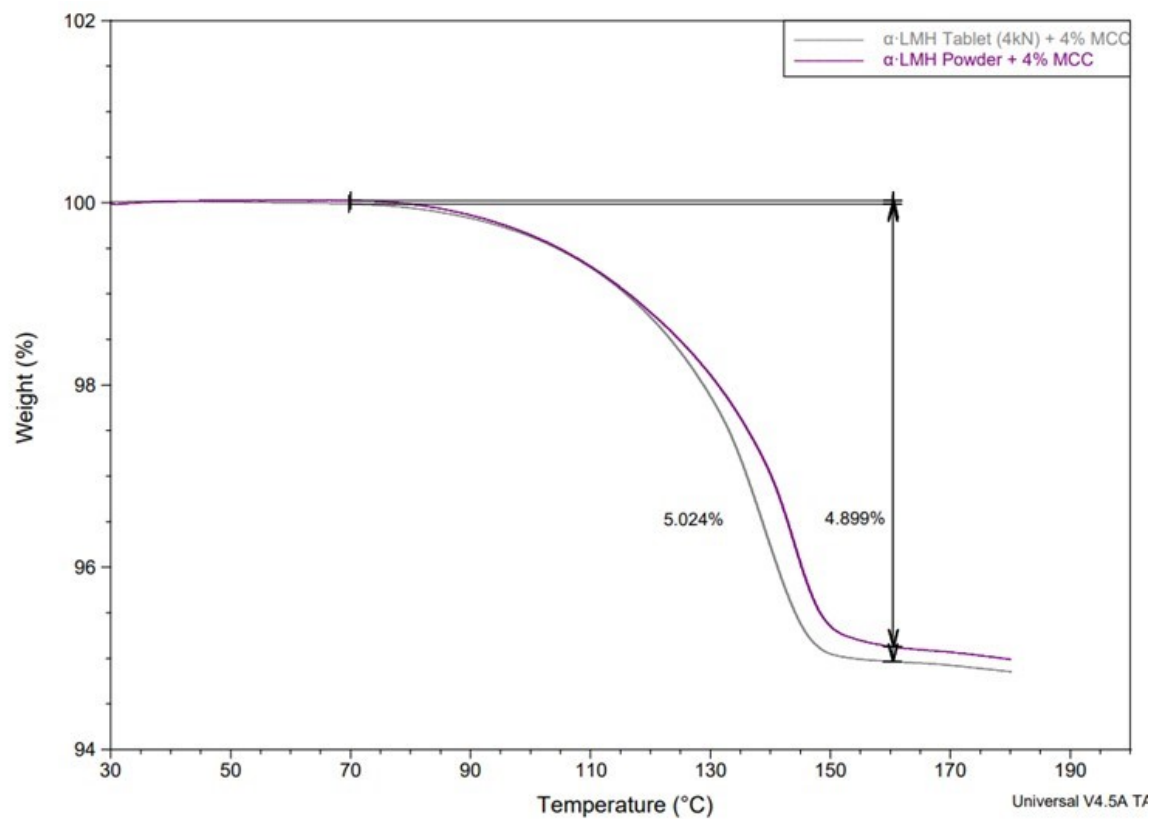

S-3: TGA thermogram comparison between  $\alpha$  lactose monohydrate tablet (grey) and powder (purple). Change in mass observed earlier with compressed tablet in contrast to powder.

## Supplementary material S-4

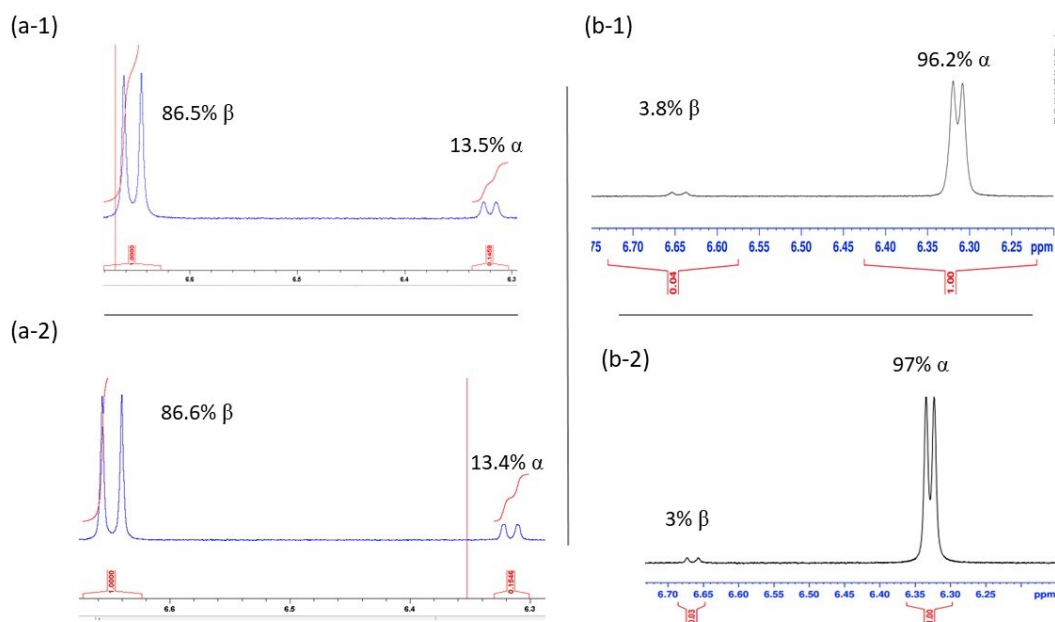

S-4:  $^1\text{H}$  NMR chemical shift of  $\beta$  lactose as received powder (a-1), compressed tablets of  $\beta$  lactose + MCC (a-2),  $\alpha$ -LMH powder as received (b-1) and compressed tablet of  $\alpha$ -LMH+ MCC (b-2).

## Supplementary material S-5

S-5: Crushing forces of tablets produced using three compression forces containing lactose comprised of powders with different  $\alpha/\beta$  ratios ( $n=10 \pm \text{SD}$ ).  $\alpha$  lactose monohydrate powders were subjected to identical durations and condition to the epimerised  $\beta$  anhydrous lactose prior to testing ( $40^\circ\text{C}/75\%\text{RH}$ ). Any significant difference between starting material (13.5%  $\alpha$  -  $\beta$  lactose as received) and tablets produced with powders stored for 35 or 60 days are marked by an asterix ( $p \leq 0.05$ ).

| <b>Compression Force (kN)</b> | <b>13.5% <math>\alpha</math> - <math>\beta</math> lactose as received (N)</b>                      | <b>50.2 % <math>\alpha</math> anomer (N)</b>                                                                  | <b>79.5% <math>\alpha</math> anomer (N)</b>                                                                |
|-------------------------------|----------------------------------------------------------------------------------------------------|---------------------------------------------------------------------------------------------------------------|------------------------------------------------------------------------------------------------------------|
| <b>10</b>                     | 41.1 $\pm$ 1.8                                                                                     | 40.3 $\pm$ 4                                                                                                  | 39 $\pm$ 4                                                                                                 |
| <b>20</b>                     | 122.9 $\pm$ 21                                                                                     | 117.4 $\pm$ 9                                                                                                 | 142.1 $\pm$ 6*                                                                                             |
| <b>40</b>                     | 170.2 $\pm$ 16                                                                                     | 187 $\pm$ 24                                                                                                  | 207.4 $\pm$ 19 *                                                                                           |
| <b>Compression Force (kN)</b> | <b><math>\alpha</math> lactose monohydrate<br/>As received – 96.6% <math>\alpha</math> anomer)</b> | <b><math>\alpha</math> lactose monohydrate<br/>Stored for 35 days –<br/>97.7% <math>\alpha</math> anomer)</b> | <b><math>\alpha</math> lactose monohydrate<br/>Stored for 60 days (98%<br/><math>\alpha</math> anomer)</b> |
| <b>10</b>                     | 46 $\pm$ 5                                                                                         | 45.4 $\pm$ 4                                                                                                  | 45.7 $\pm$ 4                                                                                               |
| <b>20</b>                     | 78.8 $\pm$ 10.4                                                                                    | 76.1 $\pm$ 6.6                                                                                                | 70.4 $\pm$ 10.4                                                                                            |
| <b>40</b>                     | 127.3 $\pm$ 17.7                                                                                   | 117.1 $\pm$ 18.7                                                                                              | 127.8 $\pm$ 13.5                                                                                           |

### Supplementary material S-6

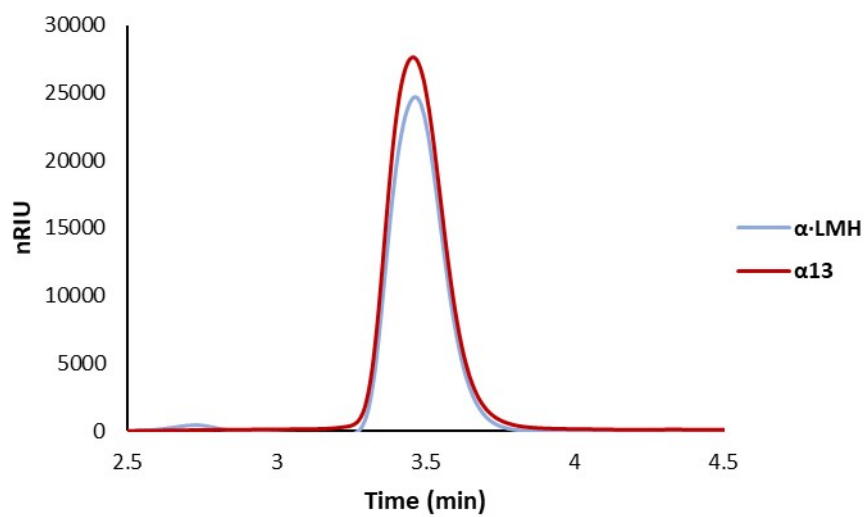

**S-6:** Comparative RI chromatogram between  $\alpha$  lactose monohydrate (blue) and  $\beta$  lactose as received powders (red).

# Supplementary material S-7

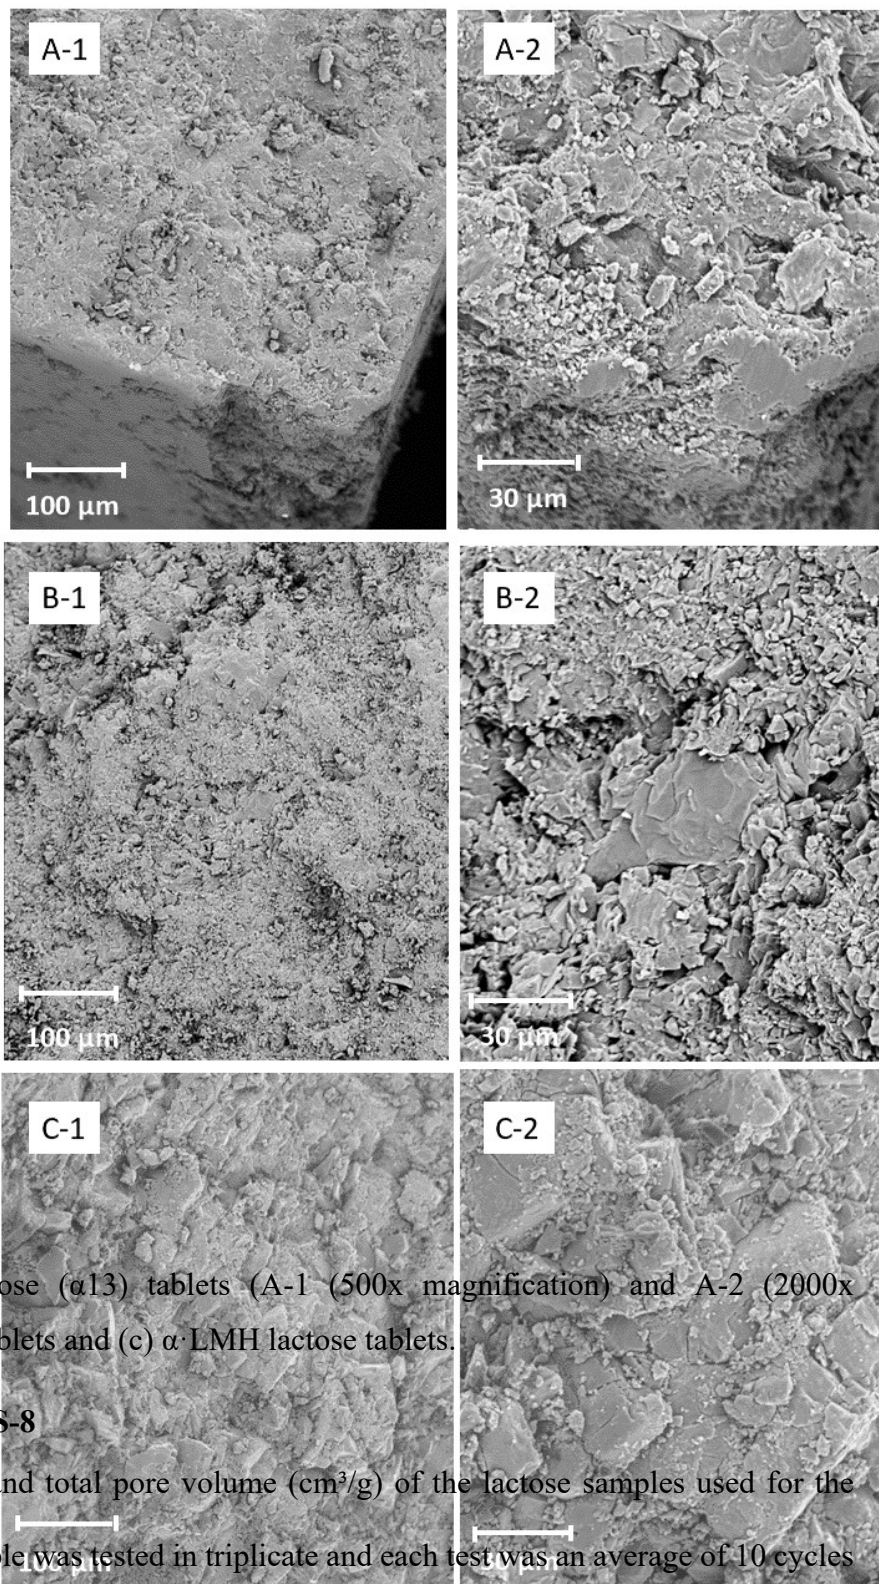

S-7: (A) SEM of  $\beta$  lactose ( $\alpha$ 13) tablets (A-1 (500x magnification) and A-2 (2000x magnification)), (B)  $\alpha$ 79 tablets and (c)  $\alpha$  LMH lactose tablets.

## Supplementary material S-8

S-8 True density ( $\text{g}/\text{cm}^3$ ) and total pore volume ( $\text{cm}^3/\text{g}$ ) of the lactose samples used for the tabletting study. Each sample was tested in triplicate and each test was an average of 10 cycles

( $n=30$ ). \* Represents statistical difference with the starting material ( $\beta$ -lactose as received). +

Represents data less than 3 decimal places.

| Sample | True Density<br>( $\text{g}/\text{cm}^3$ ) | $\pm$ SD | Total Pore<br>volume ( $\text{cm}^3/\text{g}$ ) | $\pm$ SD |
|--------|--------------------------------------------|----------|-------------------------------------------------|----------|
|--------|--------------------------------------------|----------|-------------------------------------------------|----------|

|                                                                  |        |                |        |                |
|------------------------------------------------------------------|--------|----------------|--------|----------------|
| <b>'β lactose' (i.e. containing 13.5%-α-lactose as received)</b> | 1.579  | 0.001          | 0.366  | 0 <sup>+</sup> |
| <b>50.2% α lactose</b>                                           | 1.552* | 0 <sup>+</sup> | 0.355* | 0 <sup>+</sup> |
| <b>79.5% α lactose</b>                                           | 1.546* | 0 <sup>+</sup> | 0.353* | 0 <sup>+</sup> |
| <b>α-LMH</b>                                                     | 1.541  | 0 <sup>+</sup> | 0.351  | 0 <sup>+</sup> |
| <b>Acetylsalicylic Acid (ASA)</b>                                | 1.384  | 0 <sup>+</sup> | 0.277  | 0 <sup>+</sup> |

**Supplementary material S-9**



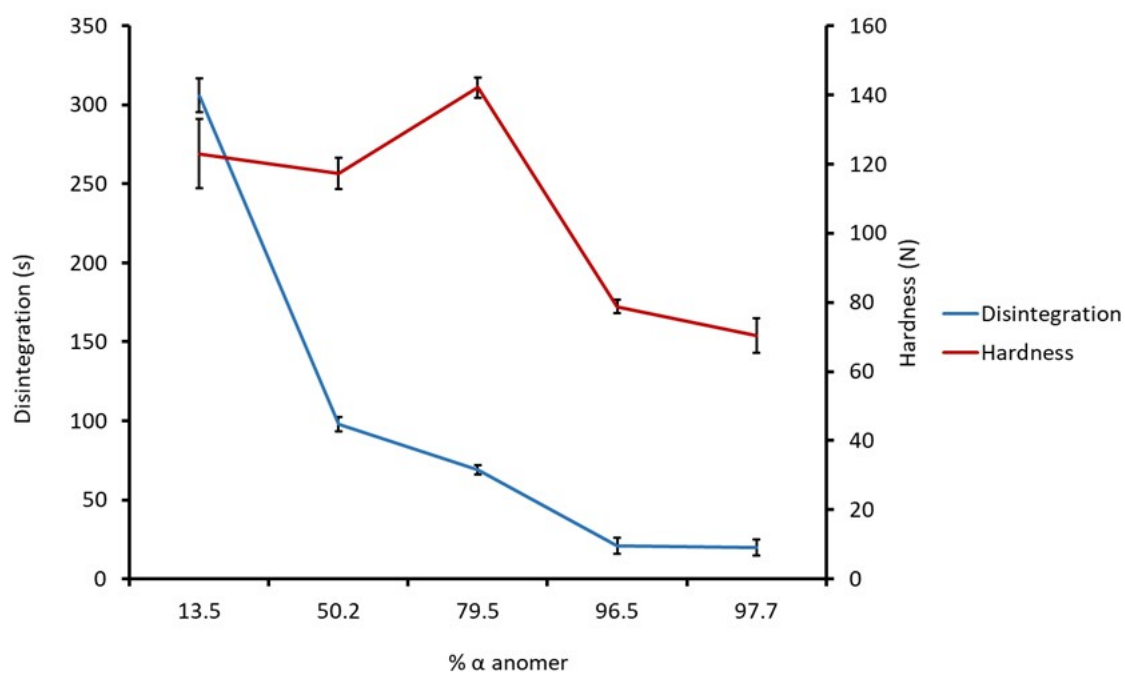

Figure S 9: Comparison between hardness properties (red) and disintegration times (blue) of tablets prepared using a compression force of 20 kN. The x-axis represents the  $\alpha$  anomeric content of tablets,  $\beta$  lactose as received (13.5%  $\alpha$ ),  $\alpha$ 50,  $\alpha$ 79.5,  $\alpha$ ·LMH as received (96.5 %  $\alpha$ ) and  $\alpha$ ·LMH stored for 60 days at 40°C/75% RH (97.7%  $\alpha$ ).

# Supplementary material S-10

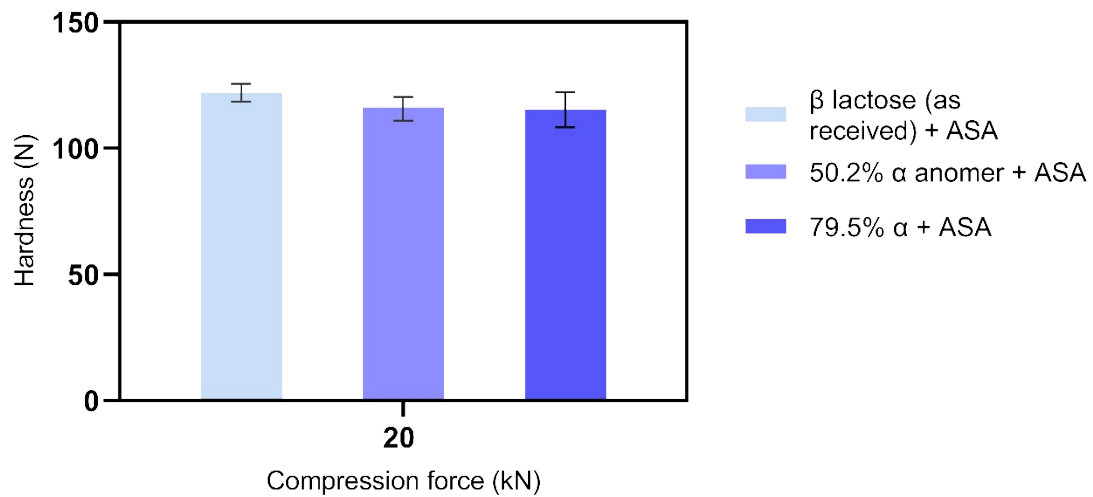

S-10: Hardness properties of tablets containing different anomeric content of lactose + ASA (1:1 ratio).  $\pm$ SD ( $n=10$ ). No statistical differences were recorded.
